# Supplementary material for: Investigating the Role of Endothelial Glycogen Synthase Kinase3α/β in Atherogenesis in Low Density Lipoprotein Receptor Knockout Mice
Source: MDPI journal article supplement (doi:10.3390/ijms232314780), 2022-11-26
Supplement: s1 [file s1]

A

 $\alpha^{fl/fl}$  Mouse model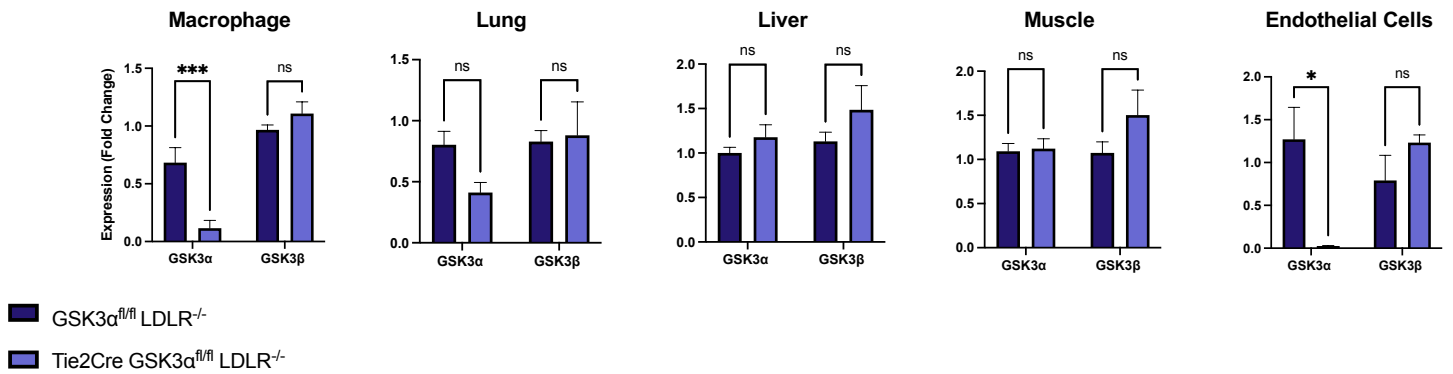

B

 $\beta^{fl/fl}$  Mouse model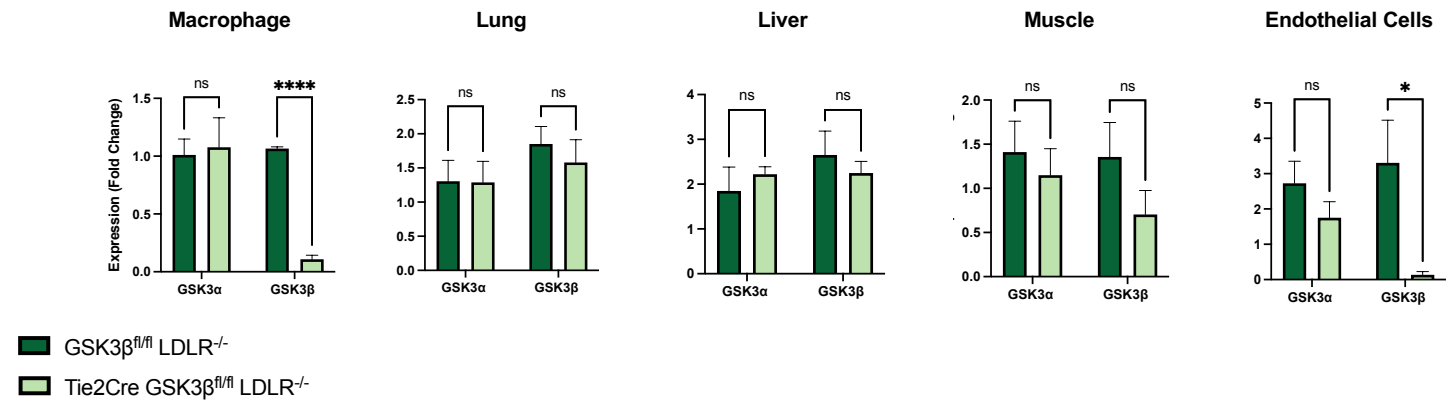

C

## vWF expression

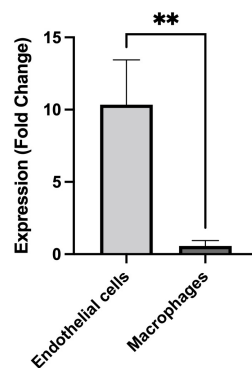

**Supplementary Figure S1: Characterizing the endothelial/macrophage GSK3α/β knockout mouse model.** **A** Gene expression of GSK3α/β was assessed in macrophages, lung, liver, skeletal muscle and endothelial cells from GSK3α<sup>fl/fl</sup> LDLR<sup>-/-</sup> and Tie2Cre GSK3α<sup>fl/fl</sup> LDLR<sup>-/-</sup> mice. **B** Gene expression of GSK3α/β was assessed in macrophages, lung, liver, skeletal muscle and endothelial cells from GSK3β<sup>fl/fl</sup> LDLR<sup>-/-</sup> and Tie2Cre GSK3β<sup>fl/fl</sup> LDLR<sup>-/-</sup> mice. Gene expression was normalised to a βactin control. **C** To verify that the cells isolated from murine aortas were, in fact, endothelial cells, the expression of endothelial marker, vWF was assessed. n=3-7, \* P<0.05, \*\*P<0.005, \*\*\*P<0.0005, \*\*\*\*P<0.00005.

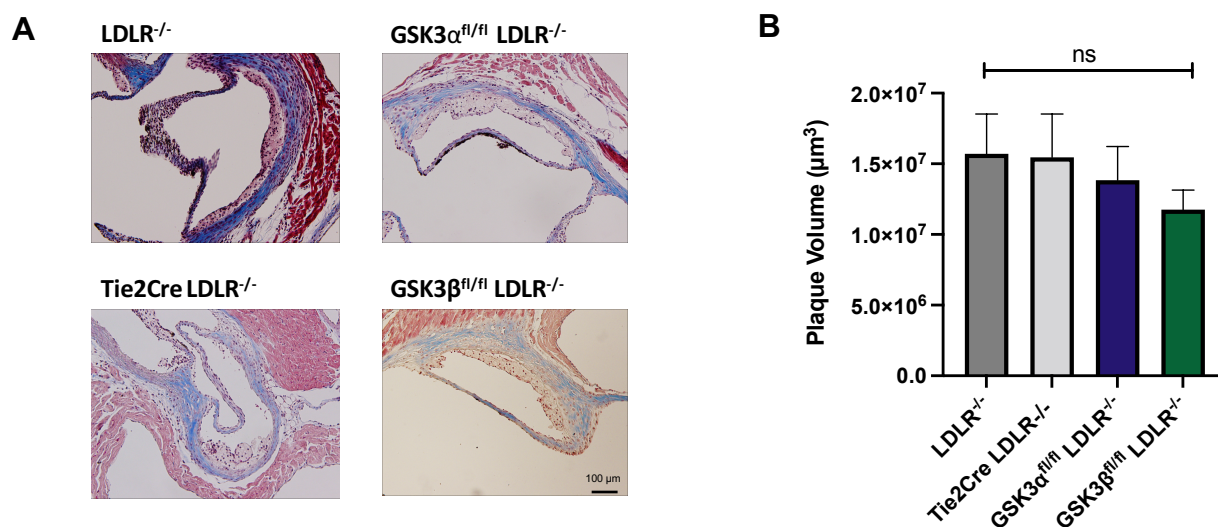

**Supplementary Figure S2: Atherosclerosis in control mice from the endothelial/macrophage GSK3 $\alpha/\beta$  knockout mouse model.** **A** Representative images of aortic sinus cross sections from 15 week old control LDLR<sup>-/-</sup>, Tie2Cre LDLR<sup>-/-</sup>, GSK3 $\alpha^{fl/fl}$  LDLR<sup>-/-</sup> and GSK3 $\beta^{fl/fl}$  LDLR<sup>-/-</sup> mice stained with Masson's Trichrome. Scale bar represents 100 $\mu$ m. **B** Plaque volume quantification in the aortic sinus of control mice, n=4-8.



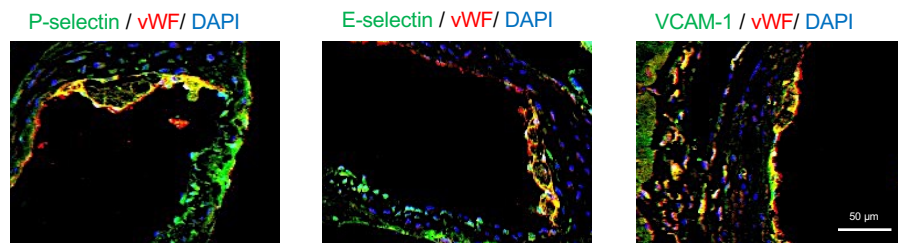

**Supplementary Figure S3: *Co-staining of adhesion protein and vWF.*** Representative images of aortic cross sections stained with antibodies against vWF and P-selectin, E-selectin or VCAM-1. Green represents the adhesion proteins (P-selectin, E-selectin and VCAM-1), red represents vWF staining and blue represents DAPI. Yellow represents where both proteins are present. Scale bar represents 50μm.

**A**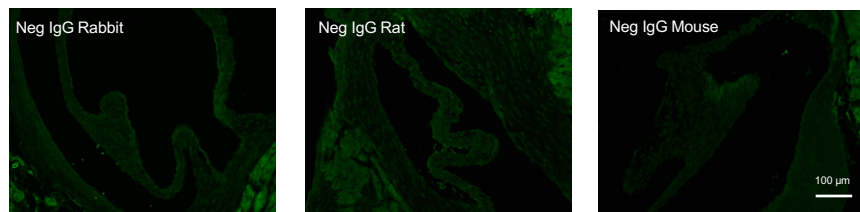**B**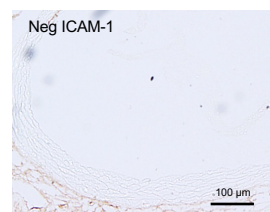

**Supplementary Figure S4: *Negative controls for immunofluorescence and immunohistochemistry staining.*** **A** Pre-immune IgG rabbit was used in place of primary antibody as a negative control for both E-selectin and VCAM-1 staining. Pre-immune IgG rat was used in place of primary antibody as a negative control for Mac-3 staining. Pre-immune IgG mouse was used in place of primary antibody as a negative control for P-selectin staining. **B** Pre-immune goat IgG was used in place of the primary antibody for a negative control for ICAM-1 staining. Scale bar represents 100 $\mu\text{m}$ .

**A**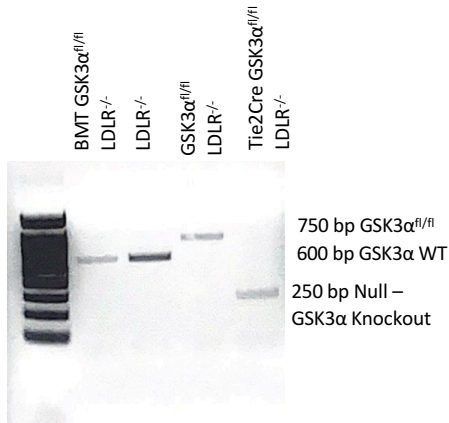**B**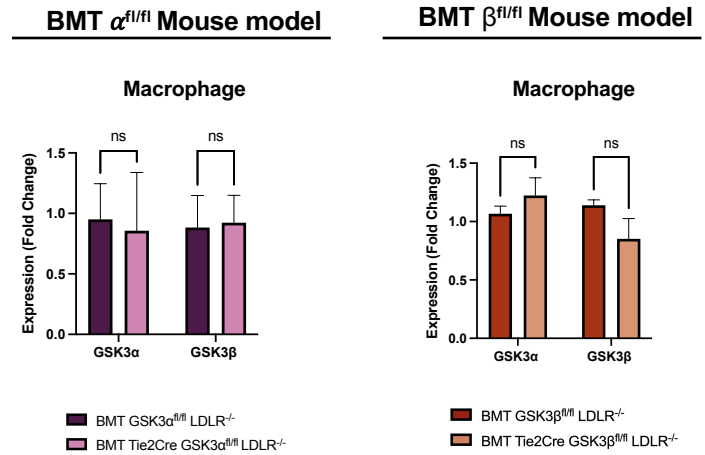

**Supplementary Figure S5: Confirmation that BMT restored GSK3 $\alpha$  and GSK3 $\beta$  in macrophages.** **A** PCR analysis of genomic DNA from blood cells from BMT GSK3 $\alpha^{fl/fl}$  LDLR $^{-/-}$ , LDLR $^{-/-}$ , GSK3 $\alpha^{fl/fl}$  LDLR $^{-/-}$ , and Tie2Cre GSK3 $\alpha^{fl/fl}$  LDLR $^{-/-}$  mice. Results confirm that BMT mice have the GSK3 $\alpha$  wildtype (WT) gene restored. **B** RT-PCR analysis of GSK3 $\alpha/\beta$  expression in macrophages isolated from BMT GSK3 $\alpha^{fl/fl}$  LDLR $^{-/-}$ , BMT Tie2Cre GSK3 $\alpha^{fl/fl}$  LDLR $^{-/-}$ , BMT GSK3 $\beta^{fl/fl}$  LDLR $^{-/-}$ , and BMT Tie2Cre GSK3 $\beta^{fl/fl}$  LDLR $^{-/-}$  mice after a BMT, n=3.

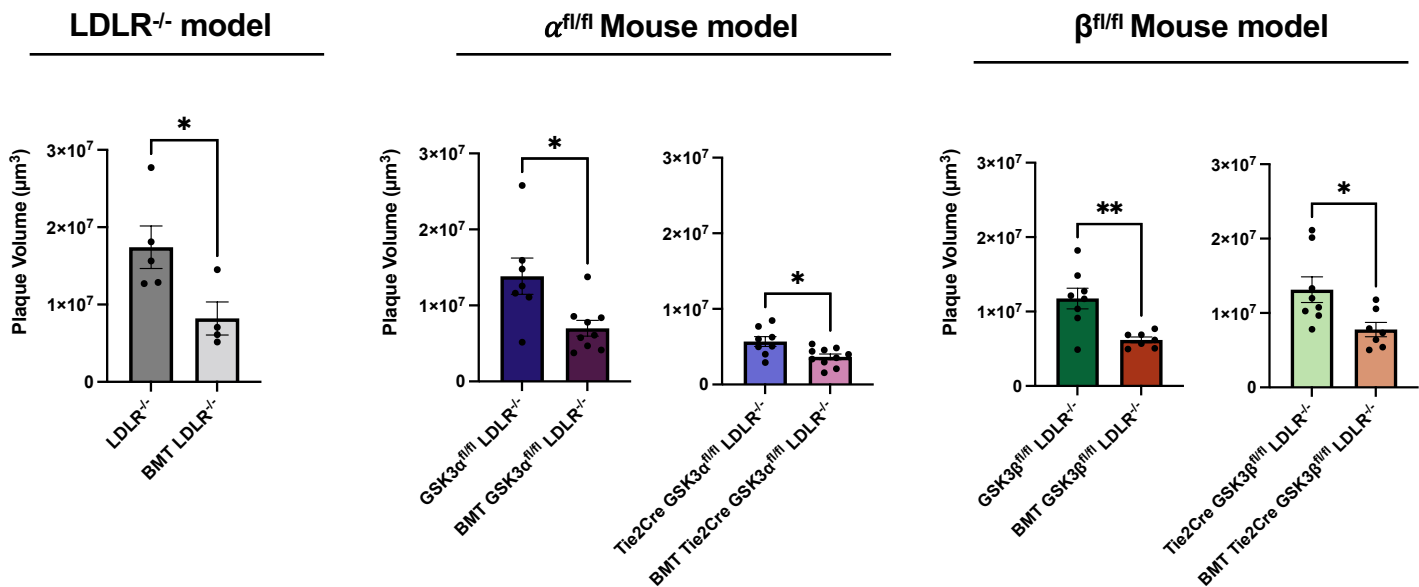

**Supplementary Figure S6: Atherosclerosis assessment comparison between non-BMT mice and BMT mice.** Plaque volume quantification in the aortic sinus of non-BMT mice and BMT mice in LDLR<sup>-/-</sup> mice, α<sup>fl/fl</sup> mouse model and the β<sup>fl/fl</sup> mouse model. n=4-10, \**P* 0.05, \*\**P* 0.05.

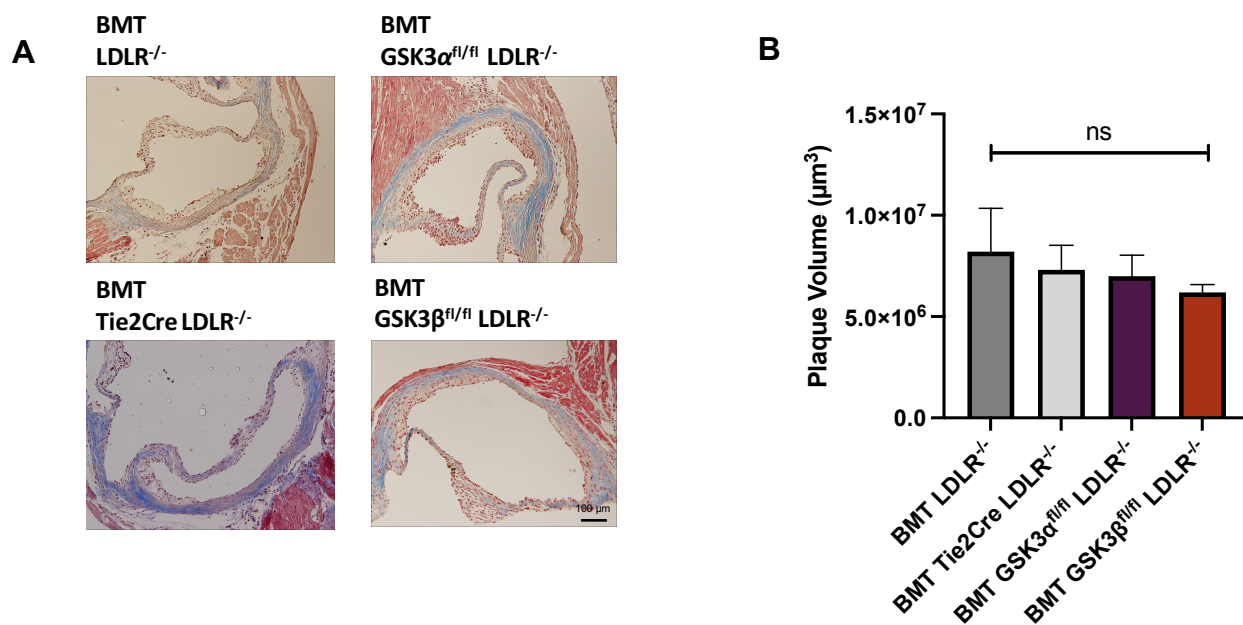

**Supplementary Figure S7: Atherosclerosis assessment in control mice from the BMT endothelial GSK3 $\alpha/\beta$  knockout mouse model.** **A** Representative images of Masson's Trichrome staining of aortic sinus cross sections from 15 week old control BMT LDLR<sup>-/-</sup>, BMT Tie2Cre LDLR<sup>-/-</sup>, BMT GSK3 $\alpha^{fl/fl}$  LDLR<sup>-/-</sup> and BMT GSK3 $\beta^{fl/fl}$  LDLR<sup>-/-</sup> mice. Scale bar represents 100 $\mu$ m. **B** Plaque volume quantification in the aortic sinus of control mice, n=4-9.

**A** Endothelial/macrophage GSK3 $\alpha$  or GSK3 $\beta$  knockout mouse model

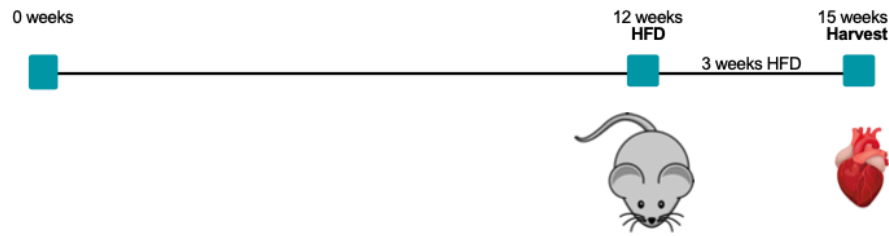

**B** BMT- Macrophage GSK3 $\alpha$  or GSK3 $\beta$  knockout mouse model

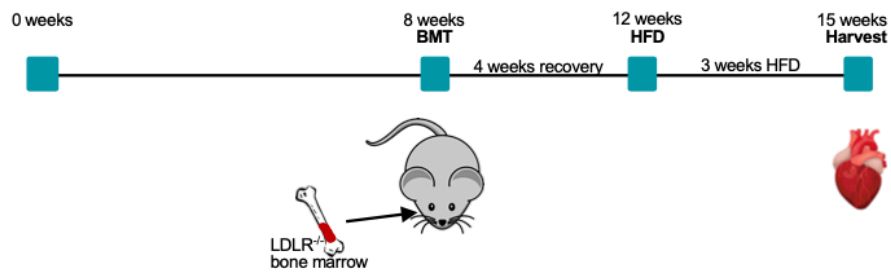

**Supplementary Figure S8: Experimental design.** **A** Experimental plan for analysis of endothelial/macrophage GSK3 knockout mice. Genotyped mice were placed on a HFD for 3 weeks and harvested at 15 weeks of age. **B** Experimental plan for BMT endothelial GSK3 $\alpha$ / $\beta$  knockout mice. Genotyped mice received a BMT at 8 weeks of age. After 4 weeks of recovery the mice were placed on a HFD for 3 weeks and harvested at 15 weeks of age. *Figure created using Biorender.com 2022.*
